# Supplementary material
Source: PubMed Central journal article supplement (PMC10524726)
Supplement: NIHMS1905408-supplement-Supinfo.pdf [file NIHMS1905408-supplement-Supinfo.pdf]

**Table S1. Exome sequencing capture statistics**

| <b>Sample ID</b> | <b>Total Reads</b> | <b>Valid Reads</b> | <b>Mapped %</b> | <b>Duplicates %</b> | <b>On target (%)</b> | <b>Data in Gb</b> | <b>Bases at 1x (%)</b> | <b>Bases at 2x (%)</b> | <b>Base at 10x (%)</b> | <b>Bases at 20x (%)</b> | <b>Bases at 30X (%)</b> | <b>Mean read length</b> | <b>Average depth</b> |
|------------------|--------------------|--------------------|-----------------|---------------------|----------------------|-------------------|------------------------|------------------------|------------------------|-------------------------|-------------------------|-------------------------|----------------------|
| DM1564           | 61424022           | 60309910           | 99              | 24                  | 98                   | 11                | 98                     | 98                     | 96                     | 93                      | 87                      | 149                     | 79                   |
| DM1565           | 65139198           | 64353052           | 99              | 24                  | 98                   | 10                | 98                     | 98                     | 97                     | 94                      | 90                      | 148                     | 96                   |
| DM1566           | 80083656           | 79151770           | 99              | 28                  | 98                   | 11                | 98                     | 98                     | 97                     | 95                      | 93                      | 148                     | 119                  |
| DM1567           | 88207890           | 87171118           | 99              | 25                  | 98                   | 12                | 98                     | 98                     | 97                     | 96                      | 94                      | 147                     | 133                  |
| DM1568           | 75949440           | 75109492           | 99              | 24                  | 98                   | 11                | 98                     | 98                     | 97                     | 95                      | 92                      | 148                     | 113                  |
| DM1569           | 74060974           | 73188336           | 99              | 22                  | 98                   | 11                | 98                     | 98                     | 97                     | 95                      | 91                      | 147                     | 113                  |
| DM1570           | 78624330           | 77705910           | 99              | 24                  | 98                   | 11                | 98                     | 98                     | 97                     | 95                      | 92                      | 148                     | 116                  |
| DM1571           | 69445464           | 68626320           | 99              | 24                  | 98                   | 11                | 98                     | 98                     | 96                     | 94                      | 90                      | 147                     | 102                  |
| DM1572           | 72728660           | 71932064           | 99              | 26                  | 98                   | 11                | 98                     | 98                     | 97                     | 94                      | 91                      | 147                     | 110                  |
| DM1573           | 79939072           | 76768058           | 99              | 26                  | 98                   | 12                | 98                     | 98                     | 97                     | 95                      | 92                      | 148                     | 110                  |
| DM1574           | 75651366           | 74315542           | 99              | 24                  | 98                   | 13                | 98                     | 98                     | 97                     | 95                      | 91                      | 149                     | 100                  |
| DM1575           | 87235650           | 86126730           | 99              | 25                  | 98                   | 13                | 98                     | 98                     | 97                     | 96                      | 93                      | 148                     | 127                  |
| DM1576           | 67711558           | 66934712           | 99              | 23                  | 98                   | 10                | 98                     | 98                     | 96                     | 94                      | 88                      | 146                     | 107                  |
| DM1582           | 61417518           | 60694476           | 99              | 24                  | 98                   | 10                | 98                     | 98                     | 96                     | 94                      | 88                      | 147                     | 92                   |
| DM1583           | 62764800           | 62029422           | 99              | 22                  | 98                   | 10                | 98                     | 98                     | 96                     | 94                      | 88                      | 147                     | 96                   |
| DM1584           | 80852010           | 79863346           | 99              | 25                  | 98                   | 12                | 98                     | 98                     | 97                     | 95                      | 92                      | 147                     | 123                  |
| DM1585           | 80057214           | 78861164           | 99              | 24                  | 98                   | 13                | 98                     | 98                     | 97                     | 95                      | 93                      | 148                     | 110                  |
| DM1586           | 79610260           | 78615232           | 99              | 24                  | 98                   | 11                | 98                     | 98                     | 97                     | 95                      | 92                      | 148                     | 119                  |
| DM1587           | 94123112           | 93026136           | 99              | 27                  | 98                   | 13                | 98                     | 98                     | 97                     | 96                      | 94                      | 147                     | 140                  |
| DM1588           | 60401114           | 58916874           | 99              | 25                  | 97                   | 11                | 98                     | 98                     | 96                     | 93                      | 86                      | 149                     | 74                   |
| DM1589           | 63337038           | 62591684           | 99              | 22                  | 98                   | 7                 | 98                     | 98                     | 96                     | 93                      | 87                      | 146                     | 101                  |
| DM1590           | 41822538           | 41281306           | 99              | 24                  | 98                   | 7                 | 98                     | 97                     | 94                     | 82                      | 64                      | 137                     | 61                   |
| DM1591           | 77566650           | 76325094           | 99              | 26                  | 98                   | 12                | 98                     | 98                     | 97                     | 95                      | 92                      | 148                     | 107                  |

**Table S2. Causal and candidate Bardet-Biedl syndrome genes**

| No | Gene identifier | Alias symbols                                                                         | HGNC ID                    | OMIM number            | Chromosomal location | Complex/subcellular localization | Reference |
|----|-----------------|---------------------------------------------------------------------------------------|----------------------------|------------------------|----------------------|----------------------------------|-----------|
| 1  | <b>BBS1</b>     | FLJ23590                                                                              | <a href="#">HGNC:966</a>   | <a href="#">209901</a> | 11q13.2              | BBSome                           | 1         |
| 2  | <b>BBS2</b>     | RP74                                                                                  | <a href="#">HGNC:967</a>   | <a href="#">606151</a> | 16q13                | BBSome                           | 2         |
| 3  | <b>ARL6</b>     | BBS3, RP55                                                                            | <a href="#">HGNC:13210</a> | <a href="#">608845</a> | 3q11.2               | ARL, ARF GTPase family           | 3 4       |
| 4  | <b>BBS4</b>     |                                                                                       | <a href="#">HGNC:969</a>   | <a href="#">600374</a> | 15q24.1              | BBSome                           | 5         |
| 5  | <b>BBS5</b>     | DKFZp762I194                                                                          | <a href="#">HGNC:970</a>   | <a href="#">603650</a> | 2q31.1               | BBSome                           | 6         |
| 6  | <b>MKKS</b>     | BBS6, HMCS, MKS, KMS                                                                  | <a href="#">HGNC:7108</a>  | <a href="#">604896</a> | 20p12.2              | Chaperonins                      | 7 8       |
| 7  | <b>BBS7</b>     | FLJ10715, BBS2L1                                                                      | <a href="#">HGNC:18758</a> | <a href="#">607590</a> | 4q27                 | BBSome                           | 9         |
| 8  | <b>TTC8</b>     | BBS8; RP51                                                                            | <a href="#">HGNC:20087</a> | <a href="#">608132</a> | 14q31.3              | BBSome                           | 10        |
| 9  | <b>BBS9</b>     | B1; PTHB1                                                                             | <a href="#">HGNC:30000</a> | <a href="#">607968</a> | 7p14.3               | BBSome                           | 11        |
| 10 | <b>BBS10</b>    | C12orf58; FLJ23560                                                                    | <a href="#">HGNC:26291</a> | <a href="#">610148</a> | 12q21.2              | Chaperonins                      | 12        |
| 11 | <b>TRIM32</b>   | LGMD2H; HT2A; TATIP; BBS11                                                            | <a href="#">HGNC:16380</a> | <a href="#">602290</a> | 9q33.1               | Cilium base                      | 13        |
| 12 | <b>BBS12</b>    | C4orf24; FLJ35630; FLJ41559                                                           | <a href="#">HGNC:26648</a> | <a href="#">610683</a> | 4q27                 | Chaperonins                      | 14        |
| 13 | <b>MKS1</b>     | BBS13; MKS; FLJ20345; POC12                                                           | <a href="#">HGNC:7121</a>  | <a href="#">609883</a> | 17q22                | Transition Zone-MKS              | 15        |
| 14 | <b>CEP290</b>   | BBS14; KIAA0373; FLJ13615; 3H11Ag; rd16; NPHP6; JBTS5; SLSN6; LCA10; MKS4; CT87; POC3 | <a href="#">HGNC:29021</a> | <a href="#">610142</a> | 12q21.32             | Transition Zone-MKS/NPHP         | 15        |
| 15 | <b>WDPCP</b>    | BBS15; C2orf86; hFrtz; fritz; CPLANE5                                                 | <a href="#">HGNC:28027</a> | <a href="#">613580</a> | 2p15                 | Basal body                       | 16        |
| 16 | <b>SDCCAG8</b>  | BBS16; NY-CO-8; CCCAP; SLSN7; NPHP10                                                  | <a href="#">HGNC:10671</a> | <a href="#">613524</a> | 1q43-q44             | Transition Zone-OFD1             | 17 18     |
| 17 | <b>LZTFL1</b>   | BBS17                                                                                 | <a href="#">HGNC:6741</a>  | <a href="#">606568</a> | 3p21.31              | BBSome regulator                 | 19        |
| 18 | <b>BBIP1</b>    | BBS18; bA348N5.3; BBIP10                                                              | <a href="#">HGNC:28093</a> | <a href="#">613605</a> | 10q25.2              | BBSome assembly                  | 20        |
| 19 | <b>IFT27</b>    | BBS19; RAYL; FAP156                                                                   | <a href="#">HGNC:18626</a> | <a href="#">615870</a> | 22q12.3              | IFT-B1 complex                   | 21        |
| 20 | <b>IFT172</b>   | BBS20; SLB; wim; osm-1; NPHP17                                                        | <a href="#">HGNC:30391</a> | <a href="#">607386</a> | 2p23.3               | IFT-B2 complex                   | 22 23     |
| 21 | <b>CFAP418</b>  | BBS21; C8orf37; FLJ30600; CORD16; RP64; FAP418; MOT25                                 | <a href="#">HGNC:27232</a> | <a href="#">614477</a> | 8q22.1               | Cilium base                      | 24 25     |

|    |               |                                                                     |                            |                        |         |                      |    |
|----|---------------|---------------------------------------------------------------------|----------------------------|------------------------|---------|----------------------|----|
| 22 | <b>IFT74</b>  | BBS22; CMG1; CMG-1;<br>FLJ22621                                     | <a href="#">HGNC:21424</a> | <a href="#">608040</a> | 9p21.2  | IFT-B1 complex       | 26 |
| 23 | <b>CEP19</b>  | BBS23; C3orf34; MGC14126                                            | <a href="#">HGNC:28209</a> | <a href="#">615586</a> | 3q29    | ?                    | 27 |
| 24 | <b>SCAPER</b> | BBS24; ZNF291; Zfp291                                               | <a href="#">HGNC:13081</a> | <a href="#">611611</a> | 15q24.3 | Cilium tip           | 28 |
| 25 | <b>CEP164</b> | KIAA1052; NPHP15                                                    | <a href="#">HGNC:29182</a> |                        | 11q23.3 | Distal appendage     | 29 |
| 26 | <b>SCLT1</b>  | hCAP-1A; FLJ30655                                                   | <a href="#">HGNC:26406</a> |                        | 4q28.2  | Distal appendage     | 30 |
| 27 | <b>TTC21B</b> | FLJ11457; JBTS11; NPHP12;<br>IFT139B; THM1; FAP60; FLA17;<br>IFT139 | <a href="#">HGNC:25660</a> |                        | 2q24.3  | IFT-A complex        | 31 |
| 28 | <b>NPHP1</b>  | NPH1; JBTS4; SLSN1                                                  | <a href="#">HGNC:7905</a>  | <a href="#">607100</a> | 2q13    | Transition Zone-NPHP | 32 |

## References

1. Mykytyn, K., Nishimura, D.Y., Searby, C.C., Shastri, M., Yen, H.J., Beck, J.S., Braun, T., Streb, L.M., Cornier, A.S., Cox, G.F., et al. (2002). Identification of the gene (BBS1) most commonly involved in Bardet-Biedl syndrome, a complex human obesity syndrome. *Nat Genet* 31, 435-438.
2. Nishimura, D.Y., Searby, C.C., Carmi, R., Elbedour, K., Van Maldergem, L., Fulton, A.B., Lam, B.L., Powell, B.R., Swiderski, R.E., Bugge, K.E., et al. (2001). Positional cloning of a novel gene on chromosome 16q causing Bardet-Biedl syndrome (BBS2). *Hum Mol Genet* 10, 865-874.
3. Fan, Y., Esmail, M.A., Ansley, S.J., Blacque, O.E., Boroevich, K., Ross, A.J., Moore, S.J., Badano, J.L., May-Simera, H., Compton, D.S., et al. (2004). Mutations in a member of the Ras superfamily of small GTP-binding proteins causes Bardet-Biedl syndrome. *Nat Genet* 36, 989-993.
4. Chiang, A.P., Nishimura, D., Searby, C., Elbedour, K., Carmi, R., Ferguson, A.L., Secrist, J., Braun, T., Casavant, T., Stone, E.M., et al. (2004). Comparative genomic analysis identifies an ADP-ribosylation factor-like gene as the cause of Bardet-Biedl syndrome (BBS3). *Am J Hum Genet* 75, 475-484.
5. Mykytyn, K., Braun, T., Carmi, R., Haider, N.B., Searby, C.C., Shastri, M., Beck, G., Wright, A.F., Iannaccone, A., Elbedour, K., et al. (2001). Identification of the gene that, when mutated, causes the human obesity syndrome BBS4. *Nat Genet* 28, 188-191.
6. Li, J.B., Gerdes, J.M., Haycraft, C.J., Fan, Y., Teslovich, T.M., May-Simera, H., Li, H., Blacque, O.E., Li, L., Leitch, C.C., et al. (2004). Comparative genomics identifies a flagellar and basal body proteome that includes the BBS5 human disease gene. *Cell* 117, 541-552.
7. Katsanis, N., Beales, P.L., Woods, M.O., Lewis, R.A., Green, J.S., Parfrey, P.S., Ansley, S.J., Davidson, W.S., and Lupski, J.R. (2000). Mutations in MKKS cause obesity, retinal dystrophy and renal malformations associated with Bardet-Biedl syndrome. *Nat Genet* 26, 67-70.
8. Slavotinek, A.M., Stone, E.M., Mykytyn, K., Heckenlively, J.R., Green, J.S., Heon, E., Musarella, M.A., Parfrey, P.S., Sheffield, V.C., and Biesecker, L.G. (2000). Mutations in MKKS cause Bardet-Biedl syndrome. *Nat Genet* 26, 15-16.
9. Badano, J.L., Ansley, S.J., Leitch, C.C., Lewis, R.A., Lupski, J.R., and Katsanis, N. (2003). Identification of a novel Bardet-Biedl syndrome protein, BBS7, that shares structural features with BBS1 and BBS2. *Am J Hum Genet* 72, 650-658.

10. Ansley, S.J., Badano, J.L., Blacque, O.E., Hill, J., Hoskins, B.E., Leitch, C.C., Kim, J.C., Ross, A.J., Eichers, E.R., Teslovich, T.M., et al. (2003). Basal body dysfunction is a likely cause of pleiotropic Bardet-Biedl syndrome. *Nature* 425, 628-633.
11. Nishimura, D.Y., Swiderski, R.E., Searby, C.C., Berg, E.M., Ferguson, A.L., Hennekam, R., Merin, S., Weleber, R.G., Biesecker, L.G., Stone, E.M., et al. (2005). Comparative genomics and gene expression analysis identifies BBS9, a new Bardet-Biedl syndrome gene. *Am J Hum Genet* 77, 1021-1033.
12. Stoetzel, C., Laurier, V., Davis, E.E., Muller, J., Rix, S., Badano, J.L., Leitch, C.C., Salem, N., Chouery, E., Corbani, S., et al. (2006). BBS10 encodes a vertebrate-specific chaperonin-like protein and is a major BBS locus. *Nat Genet* 38, 521-524.
13. Chiang, A.P., Beck, J.S., Yen, H.J., Tayeh, M.K., Scheetz, T.E., Swiderski, R.E., Nishimura, D.Y., Braun, T.A., Kim, K.Y., Huang, J., et al. (2006). Homozygosity mapping with SNP arrays identifies TRIM32, an E3 ubiquitin ligase, as a Bardet-Biedl syndrome gene (BBS11). *Proc Natl Acad Sci U S A* 103, 6287-6292.
14. Stoetzel, C., Muller, J., Laurier, V., Davis, E.E., Zaghoul, N.A., Vicaire, S., Jacquelin, C., Plewniak, F., Leitch, C.C., Sarda, P., et al. (2007). Identification of a novel BBS gene (BBS12) highlights the major role of a vertebrate-specific branch of chaperonin-related proteins in Bardet-Biedl syndrome. *Am J Hum Genet* 80, 1-11.
15. Leitch, C.C., Zaghoul, N.A., Davis, E.E., Stoetzel, C., Diaz-Font, A., Rix, S., Alfadhel, M., Lewis, R.A., Eyaid, W., Banin, E., et al. (2008). Hypomorphic mutations in syndromic encephalocele genes are associated with Bardet-Biedl syndrome. *Nat Genet* 40, 443-448.
16. Kim, S.K., Shindo, A., Park, T.J., Oh, E.C., Ghosh, S., Gray, R.S., Lewis, R.A., Johnson, C.A., Attie-Bittach, T., Katsanis, N., et al. (2010). Planar cell polarity acts through septins to control collective cell movement and ciliogenesis. *Science* 329, 1337-1340.
17. Otto, E.A., Hurd, T.W., Airik, R., Chaki, M., Zhou, W., Stoetzel, C., Patil, S.B., Levy, S., Ghosh, A.K., Murga-Zamalloa, C.A., et al. (2010). Candidate exome capture identifies mutation of SDCCAG8 as the cause of a retinal-renal ciliopathy. *Nat Genet* 42, 840-850.
18. Schaefer, E., Zaloszcyc, A., Lauer, J., Durand, M., Stutzmann, F., Perdomo-Trujillo, Y., Redin, C., Bennouna Greene, V., Toutain, A., Perrin, L., et al. (2011). Mutations in SDCCAG8/NPHP10 Cause Bardet-Biedl Syndrome and Are Associated with Penetrant Renal Disease and Absent Polydactyly. *Mol Syndromol* 1, 273-281.
19. Marion, V., Stutzmann, F., Gerard, M., De Melo, C., Schaefer, E., Claussmann, A., Helle, S., Delague, V., Souied, E., Barrey, C., et al. (2012). Exome sequencing identifies mutations in LZTFL1, a BBSome and smoothed trafficking regulator, in a family with Bardet-Biedl syndrome with situs inversus and insertional polydactyly. *J Med Genet* 49, 317-321.
20. Scheidecker, S., Etard, C., Pierce, N.W., Geoffroy, V., Schaefer, E., Muller, J., Chennen, K., Flori, E., Pelletier, V., Poch, O., et al. (2014). Exome sequencing of Bardet-Biedl syndrome patient identifies a null mutation in the BBSome subunit BBIP1 (BBS18). *J Med Genet* 51, 132-136.
21. Aldahmesh, M.A., Li, Y., Alhashem, A., Anazi, S., Alkuraya, H., Hashem, M., Awaji, A.A., Sogaty, S., Alkharashi, A., Alzahrani, S., et al. (2014). IFT27, encoding a small GTPase component of IFT particles, is mutated in a consanguineous family with Bardet-Biedl syndrome. *Hum Mol Genet* 23, 3307-3315.
22. Bujakowska, K.M., Zhang, Q., Siemiatkowska, A.M., Liu, Q., Place, E., Falk, M.J., Consugar, M., Lancelot, M.E., Antonio, A., Lonjou, C., et al. (2015). Mutations in IFT172 cause isolated retinal degeneration and Bardet-Biedl syndrome. *Hum Mol Genet* 24, 230-242.
23. Schaefer, E., Stoetzel, C., Scheidecker, S., Geoffroy, V., Prasad, M.K., Redin, C., Missotte, I., Lacombe, D., Mandel, J.L., Muller, J., et al. (2016). Identification of a novel mutation confirms the implication of IFT172 (BBS20) in Bardet-Biedl syndrome. *J Hum Genet* 61, 447-450.

24. Heon, E., Kim, G., Qin, S., Garrison, J.E., Tavares, E., Vincent, A., Nuangchamng, N., Scott, C.A., Slusarski, D.C., and Sheffield, V.C. (2016). Mutations in C8ORF37 cause Bardet Biedl syndrome (BBS21). *Hum Mol Genet* 25, 2283-2294.
25. Khan, A.O., Decker, E., Bachmann, N., Bolz, H.J., and Bergmann, C. (2016). C8orf37 is mutated in Bardet-Biedl syndrome and constitutes a locus allelic to non-syndromic retinal dystrophies. *Ophthalmic Genet* 37, 290-293.
26. Lindstrand, A., Frangakis, S., Carvalho, C.M., Richardson, E.B., McFadden, K.A., Willer, J.R., Pehlivan, D., Liu, P., Padiaditakis, I.L., Sabo, A., et al. (2016). Copy-Number Variation Contributes to the Mutational Load of Bardet-Biedl Syndrome. *Am J Hum Genet* 99, 318-336.
27. Yildiz Bolukbasi, E., Mumtaz, S., Afzal, M., Woehlbier, U., Malik, S., and Tolun, A. (2018). Homozygous mutation in CEP19, a gene mutated in morbid obesity, in Bardet-Biedl syndrome with predominant postaxial polydactyly. *J Med Genet* 55, 189-197.
28. Wormser, O., Gradstein, L., Yogev, Y., Perez, Y., Kadir, R., Goliand, I., Sadka, Y., El Riati, S., Flusser, H., Nachmias, D., et al. (2019). SCAPER localizes to primary cilia and its mutation affects cilia length, causing Bardet-Biedl syndrome. *Eur J Hum Genet* 27, 928-940.
29. Shamseldin, H.E., Shaheen, R., Ewida, N., Bubshait, D.K., Alkuraya, H., Almardawi, E., Howaidi, A., Sabr, Y., Abdalla, E.M., Alfaifi, A.Y., et al. (2020). The morbid genome of ciliopathies: an update. *Genet Med* 22, 1051-1060.
30. Morisada, N., Hamada, R., Miura, K., Ye, M.J., Nozu, K., Hattori, M., and Iijima, K. (2020). Bardet-Biedl syndrome in two unrelated patients with identical compound heterozygous SCLT1 mutations. *CEN Case Rep* 9, 260-265.
31. Meyer, J.R., Krentz, A.D., Berg, R.L., Richardson, J.G., Pomeroy, J., Hebring, S.J., and Haws, R.M. (2022). Kidney failure in Bardet-Biedl syndrome. *Clin Genet* 101, 429-441.
32. Lindstrand, A., Davis, E.E., Carvalho, C.M., Pehlivan, D., Willer, J.R., Tsai, I.C., Ramanathan, S., Zuppan, C., Sabo, A., Muzny, D., et al. (2014). Recurrent CNVs and SNVs at the NPHP1 locus contribute pathogenic alleles to Bardet-Biedl syndrome. *Am J Hum Genet* 94, 745-754.

**Table S3: List of rare variants identified and their *in silico* predicted pathogenicity scores**

| Family ID | BBS gene                                      | Transcript ID                             | Nucleotide change                               | Amino acid change                        | SIFT (Version 6.2.1)               | Provean (Version 1.1)           | MutationTaster 2021                                   | CADD (version 1.6) |
|-----------|-----------------------------------------------|-------------------------------------------|-------------------------------------------------|------------------------------------------|------------------------------------|---------------------------------|-------------------------------------------------------|--------------------|
| DM1565    | <i>BBS2</i>                                   | NM_031885.5                               | c.1528G>T (H)                                   | p.Val510Phe                              | Damaging                           | Damaging                        | Disease causing                                       | 29.3               |
| DM1566    | <i>BBS4</i>                                   | NM_033028.5                               | c.332+8T>C (h)                                  | p.Ala74Aspfs*7                           | -                                  | -                               | Polymorphism                                          | 8.67               |
| DM1567    | <i>BBS7</i>                                   | NM_176824.3                               | c.712_715del (h)                                | p.Arg238Glufs*59                         | -                                  | -                               | -                                                     | -                  |
| DM1569    | <i>BBS12</i>                                  | NM_152618.3                               | c.1063C>T (H)                                   | p.Arg355*                                | Damaging                           | -                               | Disease causing                                       | 35                 |
| DM1570    | <i>BBS5</i>                                   | NM_152384.3                               | c.619-1G>C (H)                                  | -                                        | -                                  | -                               | Disease causing                                       | 33                 |
| DM1571    | <i>BBS7</i><br><i>BBS7</i>                    | NM_176824.3                               | c.68T>G (h)<br>c.712_715del (h)                 | p.Leu23Arg<br>p.Arg238Glufs*59           | Damaging<br>-                      | Damaging<br>-                   | Disease causing<br>-                                  | 27.1<br>-          |
| DM1572    | <i>BBS4</i>                                   | NM_033028.5                               | c.1091C>A (H)                                   | p.Ala364Glu                              | Damaging                           | Damaging                        | Disease causing                                       | 28.3               |
| DM1573    | <i>BBS12</i>                                  | NM_152618.3                               | c.1063C>T (H)                                   | p.Arg355*                                | Damaging                           | -                               | Disease causing                                       | 35                 |
| DM1574    | <i>BBS10</i><br><i>BBS10</i><br><i>IFT172</i> | NM_024685.4<br>NM_024685.4<br>NM_015662.3 | c.145C>T (h)<br>c.1804G>C (h)<br>c.1715G>A (h)  | p.Arg49Trp<br>p.Val602Leu<br>p.Arg572Gln | Damaging<br>Damaging<br>Damaging   | Damaging<br>Neutral<br>Damaging | Disease causing<br>Disease causing<br>Disease causing | 31<br>26.1<br>28.9 |
| DM1576    | <i>BBS1</i>                                   | NM_024649.5                               | c.1169T>G (h)                                   | p.Met390Arg                              | Damaging                           | Damaging                        | Disease causing                                       | 25.9               |
| DM1582    | <i>BBS10</i>                                  | NM_024685.4                               | c.273C>G (H)                                    | p.Cys91Trp                               | Damaging                           | Neutral                         | Disease causing                                       | 24.9               |
| DM1584    | <i>BBS12</i>                                  | NM_152618.3                               | c.1063C>T (H)                                   | p.Arg355*                                | Damaging                           | -                               | Disease causing                                       | 35                 |
| DM1585    | <i>BBS12</i>                                  | NM_152618.3                               | c.1063C>T (H)                                   | p.Arg355*                                | Damaging                           | -                               | Disease causing                                       | 35                 |
| DM1587    | <i>BBS12</i>                                  | NM_152618.3                               | c.1063C>T (H)                                   | p.Arg355*                                | Damaging                           | -                               | Disease causing                                       | 35                 |
| DM1588    | <i>BBS12</i><br><i>BBS5</i>                   | NM_152618.3<br>NM_152384.3                | c.1063C>T (H)<br>c.226A>G (h)                   | p.Arg355*<br>p.Ile76Val                  | Damaging<br>Tolerated              | -<br>Neutral                    | Disease causing<br>Disease causing                    | 35<br>14.9         |
| DM1589    | <i>BBS12</i><br><i>SCAPER</i><br><i>NPHP1</i> | NM_152618.3<br>NM_020843.4<br>NM_000272.5 | c.1063C>T (H)<br>c.2891G>A (h)<br>c.1630A>G (h) | p.Arg355*<br>p.Arg1098Gln<br>p.Met544Val | Damaging<br>Tolerated<br>Tolerated | -<br>Damaging<br>Neutral        | Disease causing<br>Disease Causing<br>Polymorphism    | 35<br>32<br>11.5   |
| DM1590    | <i>BBS7</i>                                   | NM_176824.3                               | c.712_715del (H)                                | p.Arg238Glufs*59                         | -                                  | -                               | -                                                     | -                  |
| DM1591    | <i>BBS12</i><br><i>BBS12</i>                  | NM_152618.3                               | c.1392_1395del (h)<br>c.1682_1682del (h)        | p.Cys464Trpfs*7<br>p.Glu561Lysfs*10      | -<br>-                             | -<br>-                          | -<br>-                                                | -<br>-             |

Abbreviations: H, homozygous; h, heterozygous; SIFT, Sorting Intolerant From Tolerant; CADD, Combined Annotation Dependent Depletion.

Supp-figure 1:

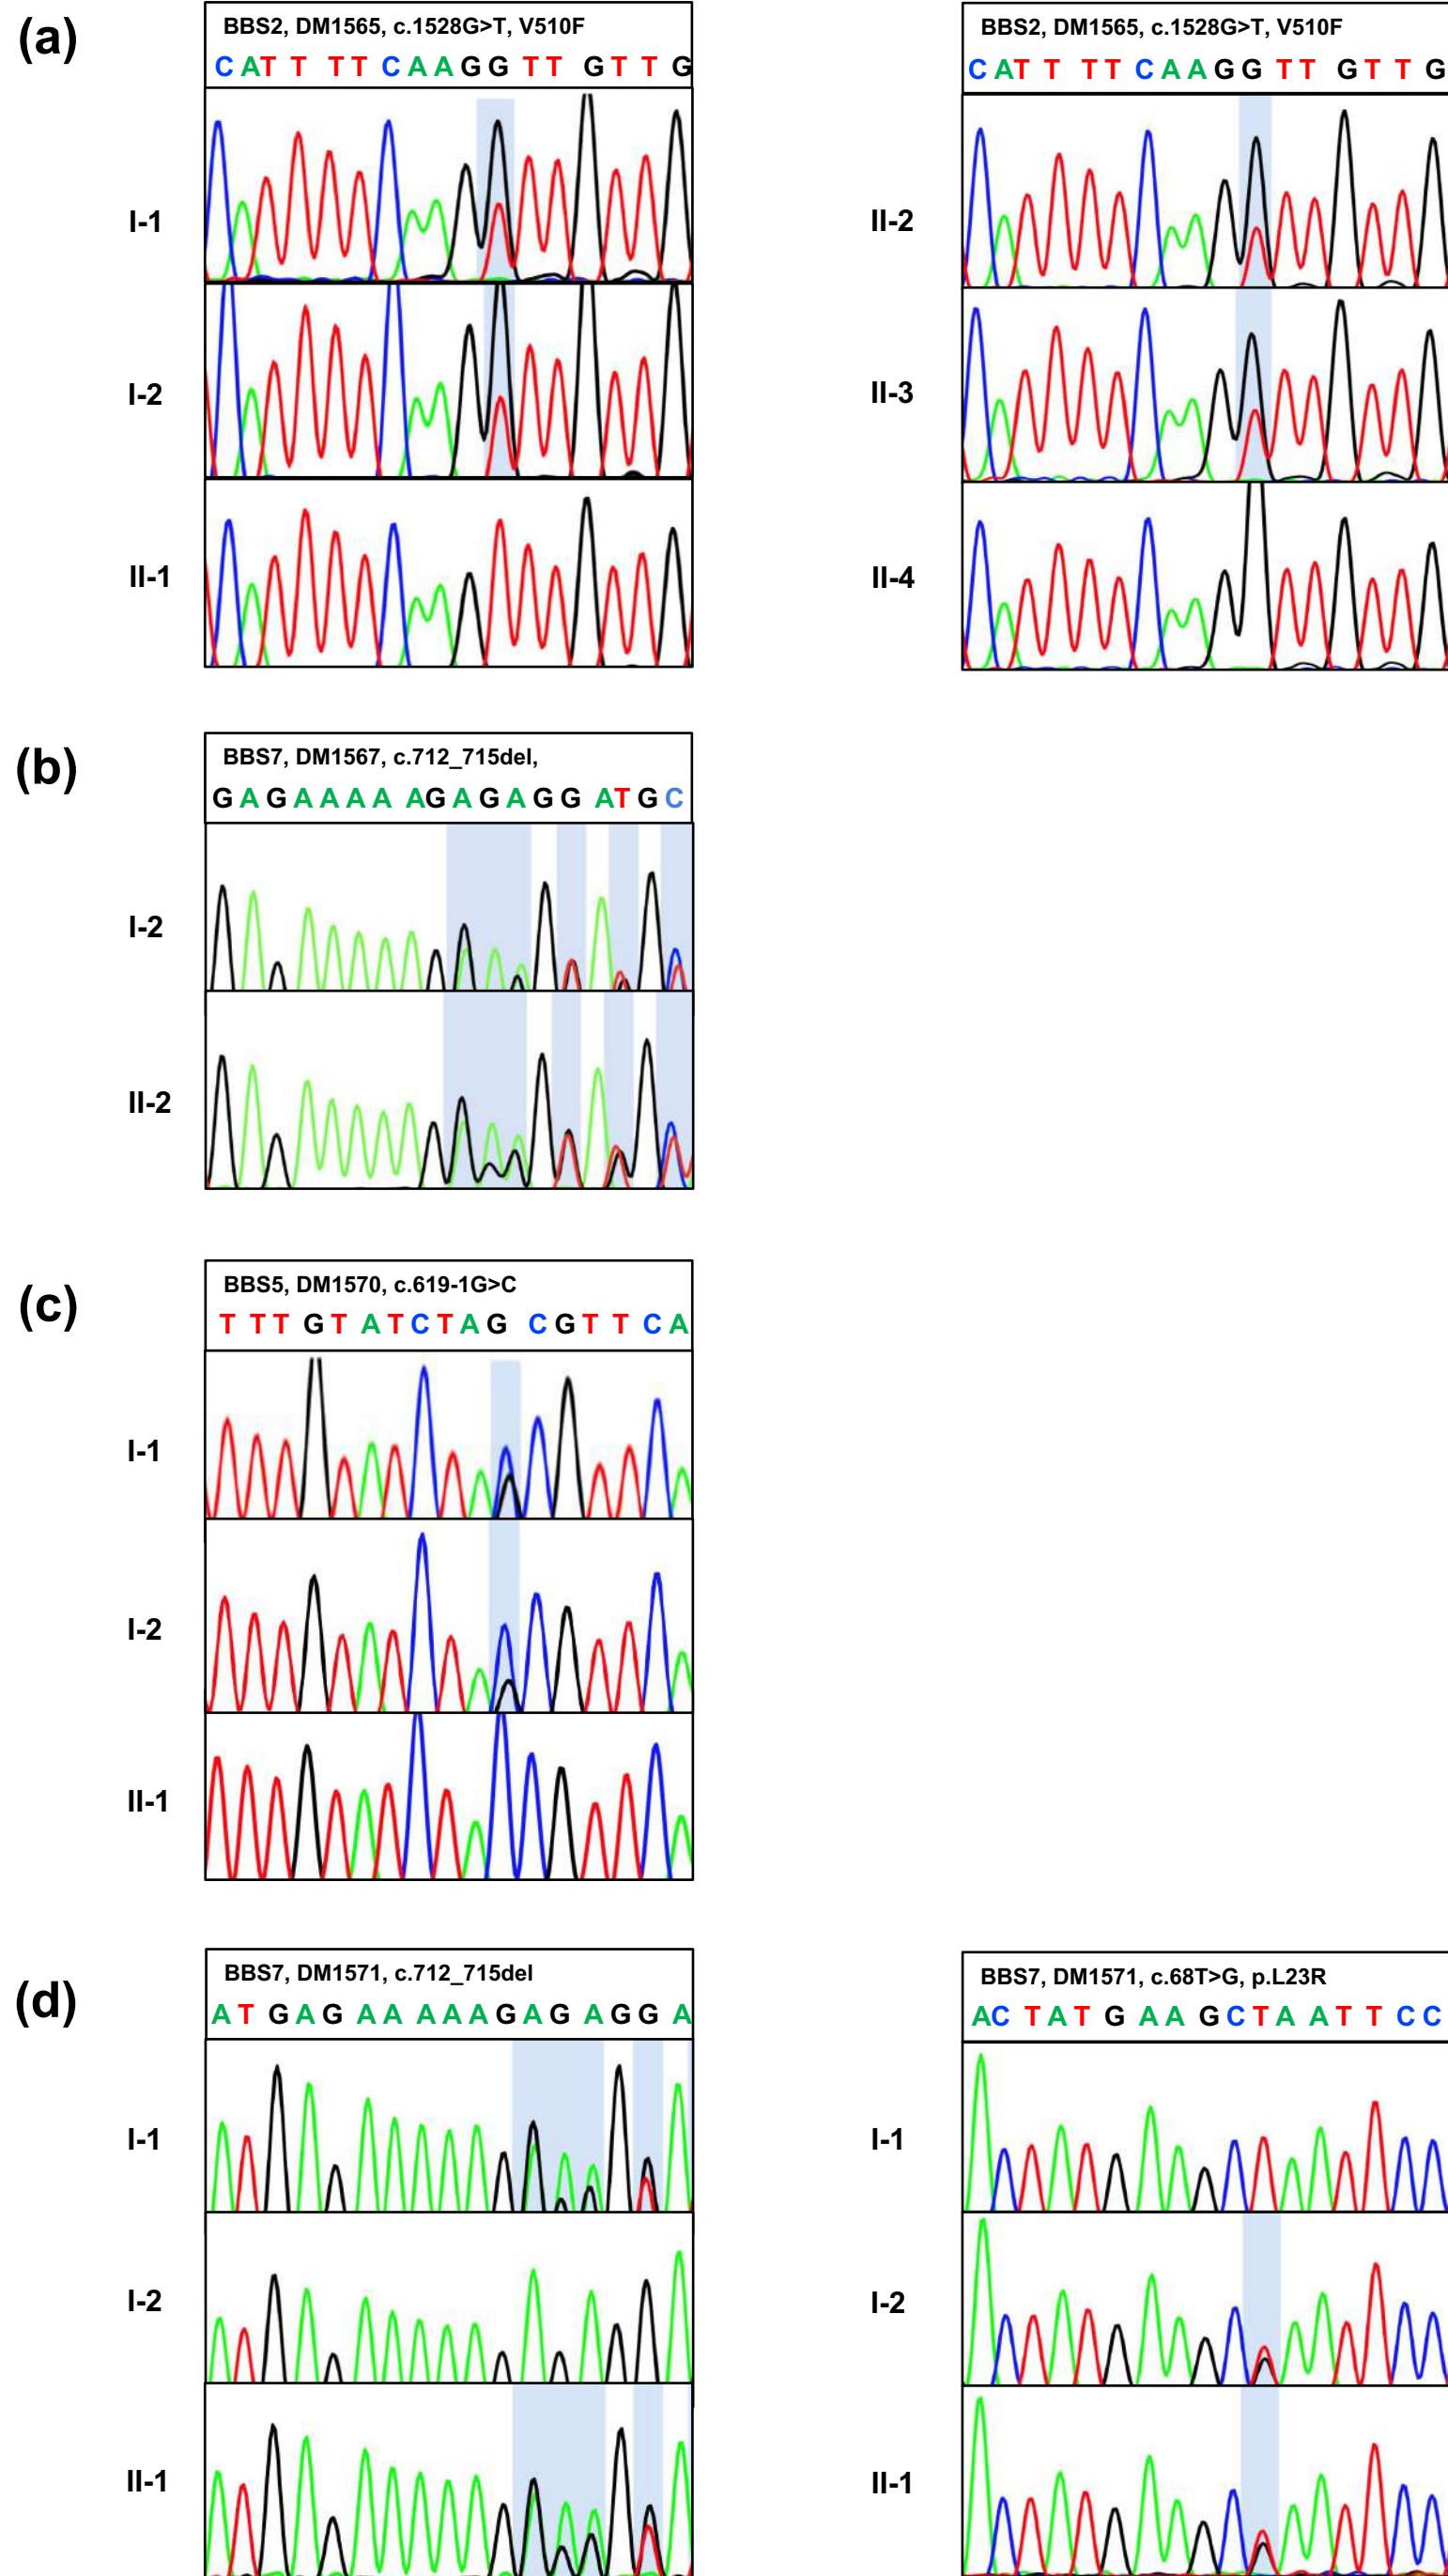



(e)

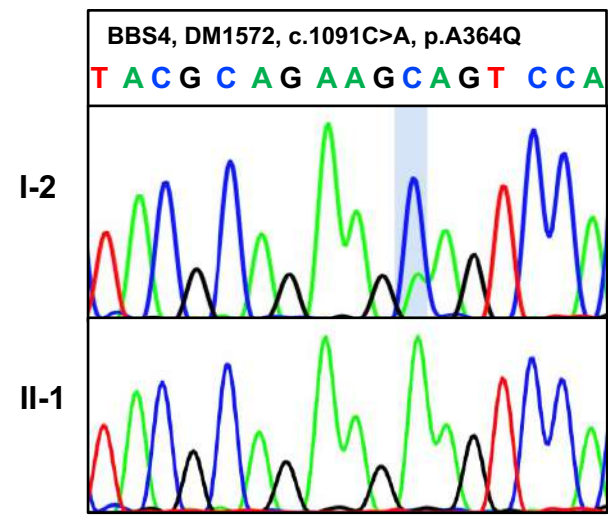

(f)

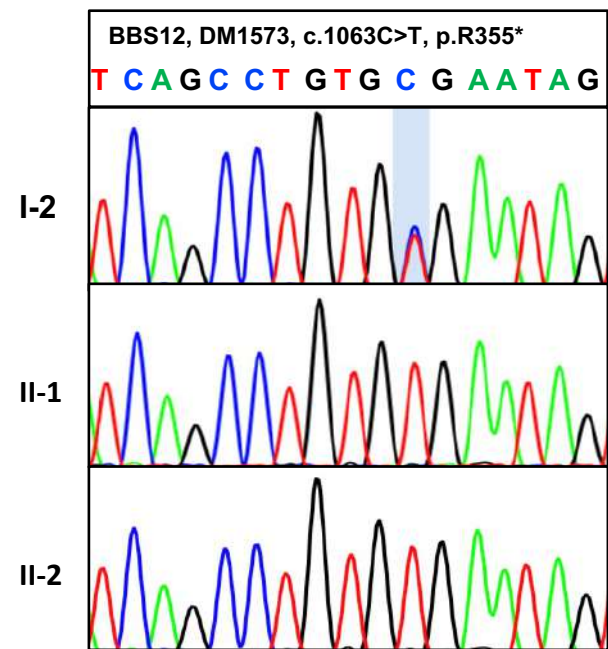

(g)

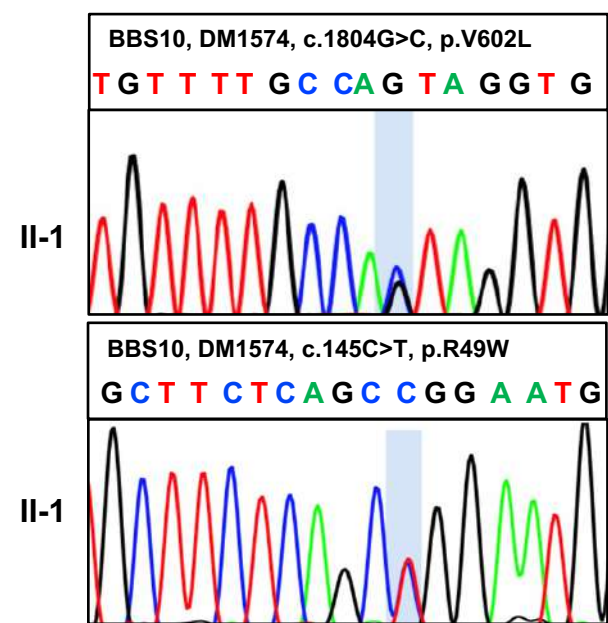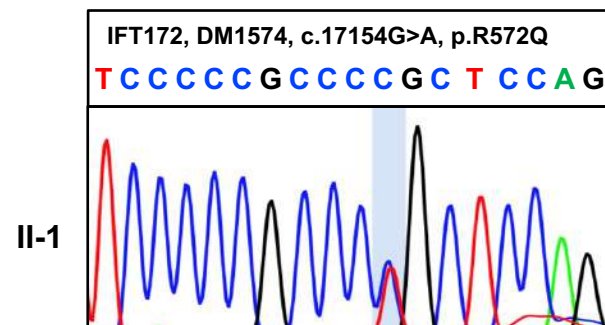

(h)

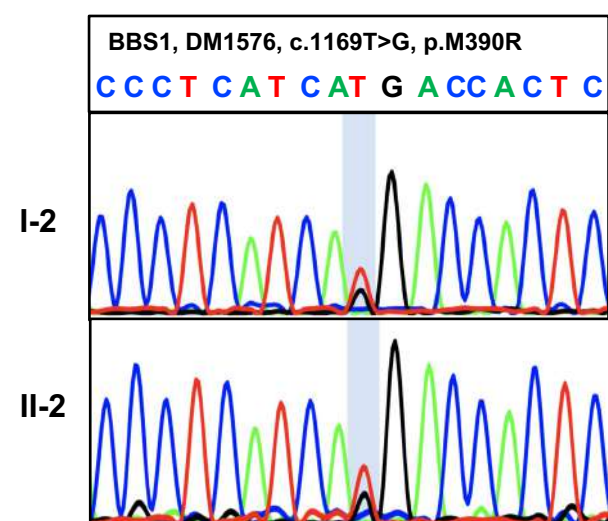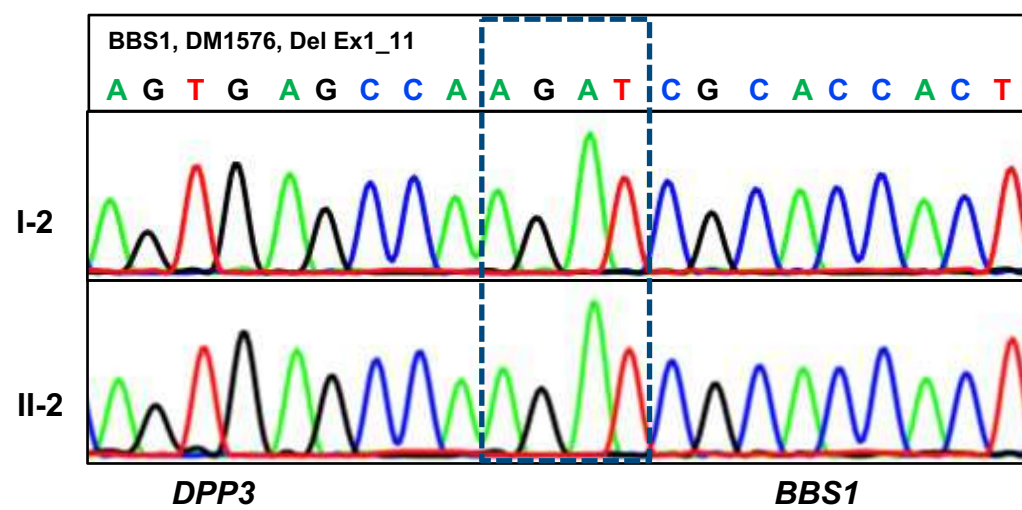



(g)

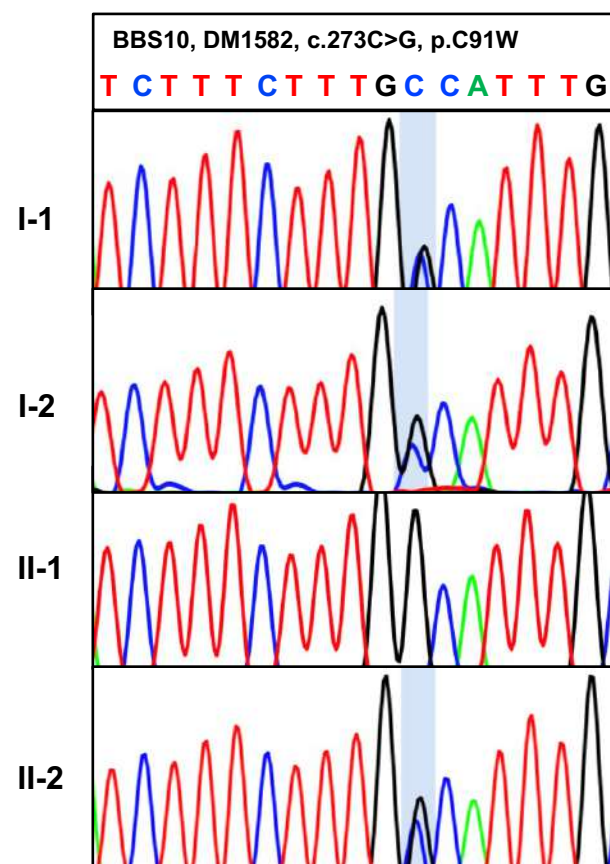

(h)

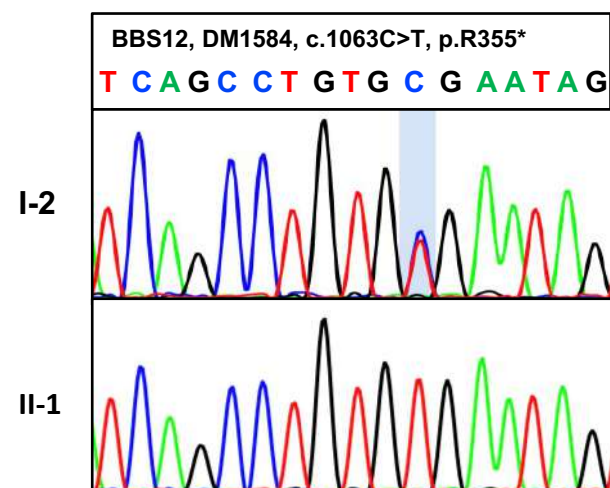

(i)

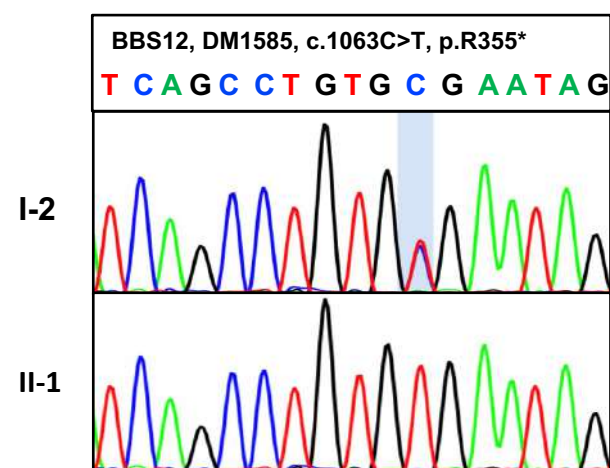

(j)

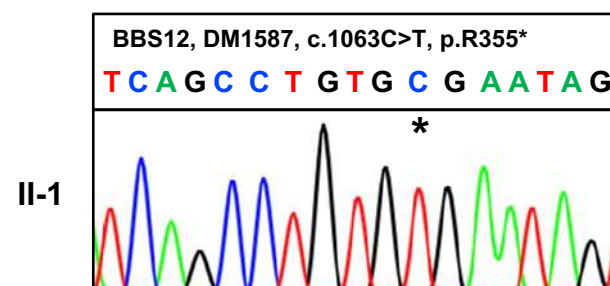

(k)

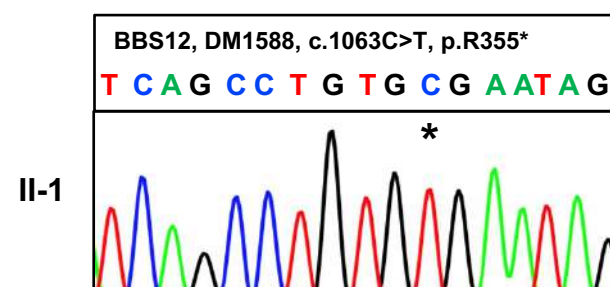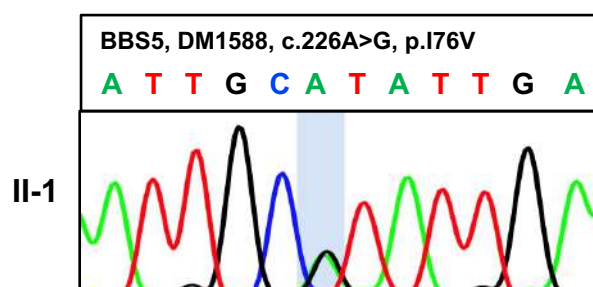

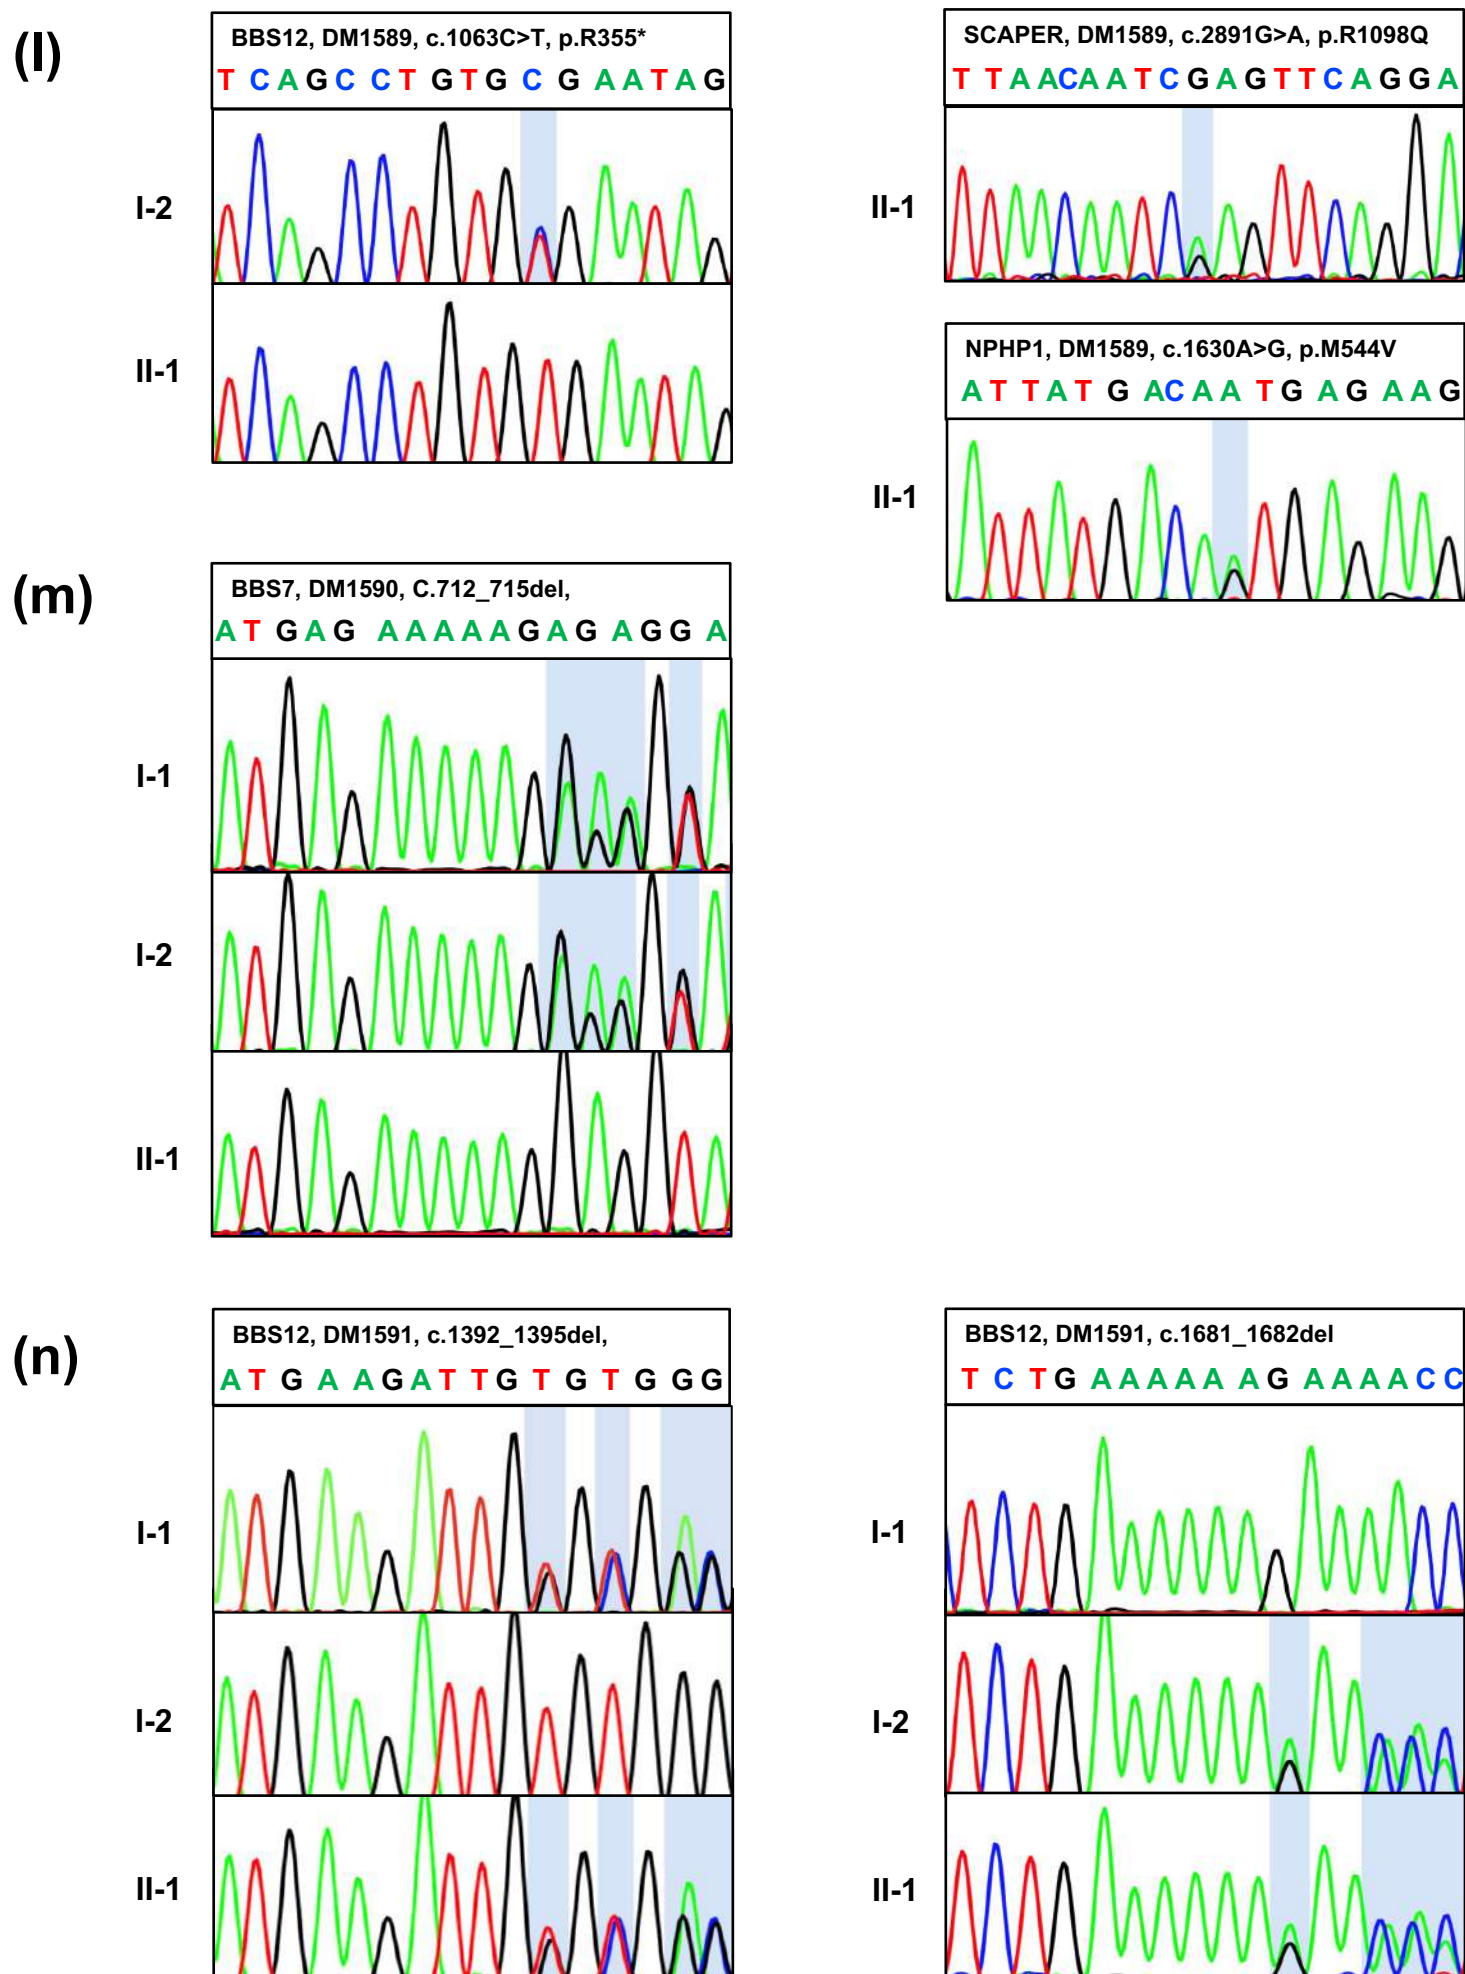

Suppl Figure 1: Chromatograms showing sequence traces of 16 different variants and one CNV identified in this study. Gene name, pedigree identifier, nucleotide substitution or deletions, and amino acid sequence change are mentioned above the sequence traces. Two novel heterozygous variants were identified in *BBS12*: c.1392\_1395del; c.1681\_1682del. followed by heterozygous allele in *BBS7*: c.68T>G. The position of identified variants is indicated by a light blue shaded line, and sequence chromatograms of the proband were shown below parents' sequence traces. Abbreviations; I-1, father; I-2, mother; II-1, proband.

**Supp-figure 2: Multiple protein sequence alignment of regions affected by missense variants.**

**BBS2 (p.V510F)**

```

Hs  TIAERAQRFVYVWLGQNF
Rn  IVVERAQRFMYTWLNQNF
Mm  SVAERTQRFMYTWLNQNF
Xt  TTSERLQRFVYVWLNQNF
Dr  CINDRPFQRFVYVWLNQNF
Dm  TATQPGQRFSDIWNLSF
    . *   :   * :   . *
  
```

**BBS4 (p.A364E)**

```

Hs  NAKRAYAEAVH-----LDKCN
Rn  NAKRAYVEAVR-----LDKCN
Mm  NARRAYVEAVR-----LDKCN
Xt  NAKSSYQQAAN-----LDQTD
Dr  NARRSYEQAVQ-----IDESS
Dm  NAFVALEPSSMATGQQGAGRN
    **  :   *
  
```

**BBS5 (p.I76V)**

```

Hs  NVSVGYNCIILNITTRTA
Rn  NLSIGYNCIILNITTRTA
Mm  NLSIGYNCIILNITTRTA
Xt  NLAVGYNCIILNITTRTA
Dr  NLSVGYNCIILNITTRTA
Dm  NLSIGYARIGNTNRV
    * : * : : * : *
  
```

**BBS7 (p.L23R)**

```

Hs  VTSQKTMKLLIPASRHRA
Rn  VTSQKTMKLLPTSRQRA
Mm  VTSQKTMKLLPTSRQRA
Xt  VTSQKTMKLLPASGRRA
Dr  VTSQKTMKLLPSAGRKS
    ***** : * : : :
  
```

**BBS10 (p.C91W)**

```

Hs  AKTFIIFICHLLRGLHA
Rn  -----RGLHA
Mm  AKTFIIFICHLLRGLHA
Xt  VKSFVLLICGVLRELQA
Dr  TKSFILLISALLRAIQD
  
```

**BBS10 (p.R49W)**

```

Hs  PTGEVLLSRNGGRLLLEA
Rn  PTGEVLLSRDGGCLLEA
Mm  PTGEVLLSRDGGCLLEA
Xt  -----
Dr  DTGETLISRHGQVRLST
  
```

**BBS10 (p.V602L)**

```

Hs  MPAGCVLPVGGNFEILL
Rn  VPAGCVLPVGGHFEILM
Mm  VPAGCVLPVGGSF EILM
Xt  DNTGCVLPGGGT FEMLL
Dr  MQAGGVLPVGGVFEFL
    : * : * * * : * * * :
  
```

**SCAPER (p.R1098E)**

```

Hs  QGDPFNRRVQDLISYV
Rn  QGDAFNRRVQDLISYV
Mm  QGDAFNRRVQDLISYV
Xt  APDAFNRRIQDIISYI
Dr  ASENFNTRAQDLISYV
Dm  THPKVPERLPDMINYA
    . *   * : * : *
  
```

**IFT172 (p.R572Q)**

```

Hs  RGDVIGLERGGGKTEVM
Rn  RGDVVGLERGGGKTEVM
Mm  RGDVVGLERGGGKTEVM
Xt  KGDIVDLERKEGKTEVI
Dr  KGDIVDLERSNGKTEVI
Dm  RGEAIEVLRNGRTVVR
    : * : : *   * : * *
  
```

**NPHP1 (p.M544V)**

```

Hs  SVFYQIMTMRRQPQLLV
Rn  SVFRQMISVRRQPQLLV
Mm  SVFRQMISVRRQPQLLV
Xt  GVFHQRLRTQRKQPQLLV
Dr  GVFHQMLLSRKMPKLVV
Dm  -----
  
```

Multiple sequence alignment generated with Clustal Omega shows amino acid conservation around the residues affected by variants in known BBS genes. Blue boxes indicate the position of missense variants identified in this cohort. Asterisk (\*) indicates amino acid sequence identity and (:) indicates amino acid similarity. Abbreviations: *Hs*, *Homo sapiens*; *Rn*, *Rattus norvegicus*; *Mm*, *Mus musculus*; *Xt*, *Xenopus tropicalis*; *Dr*, *Danio rerio*; *Dm*, *Drosophila melanogaster*
